# Supplementary material
Source: PubMed Central journal article supplement (PMC4896391)
Supplement: NIHMS68656-supplement-Supplemental_Experimental_Procedure.pdf [file NIHMS68656-supplement-Supplemental_Experimental_Procedure.pdf]

**Developmental Cell, Volume 36**

**Supplemental Information**

**Transposable Elements and Their KRAB-ZFP**

**Controllers Regulate Gene Expression**

**in Adult Tissues**

**Gabriela Ecco, Marco Cassano, Annamaria Kauzlaric, Julien Duc, Andrea Coluccio, Sandra Offner, Michaël Imbeault, Helen M. Rowe, Priscilla Turelli, and Didier Trono**

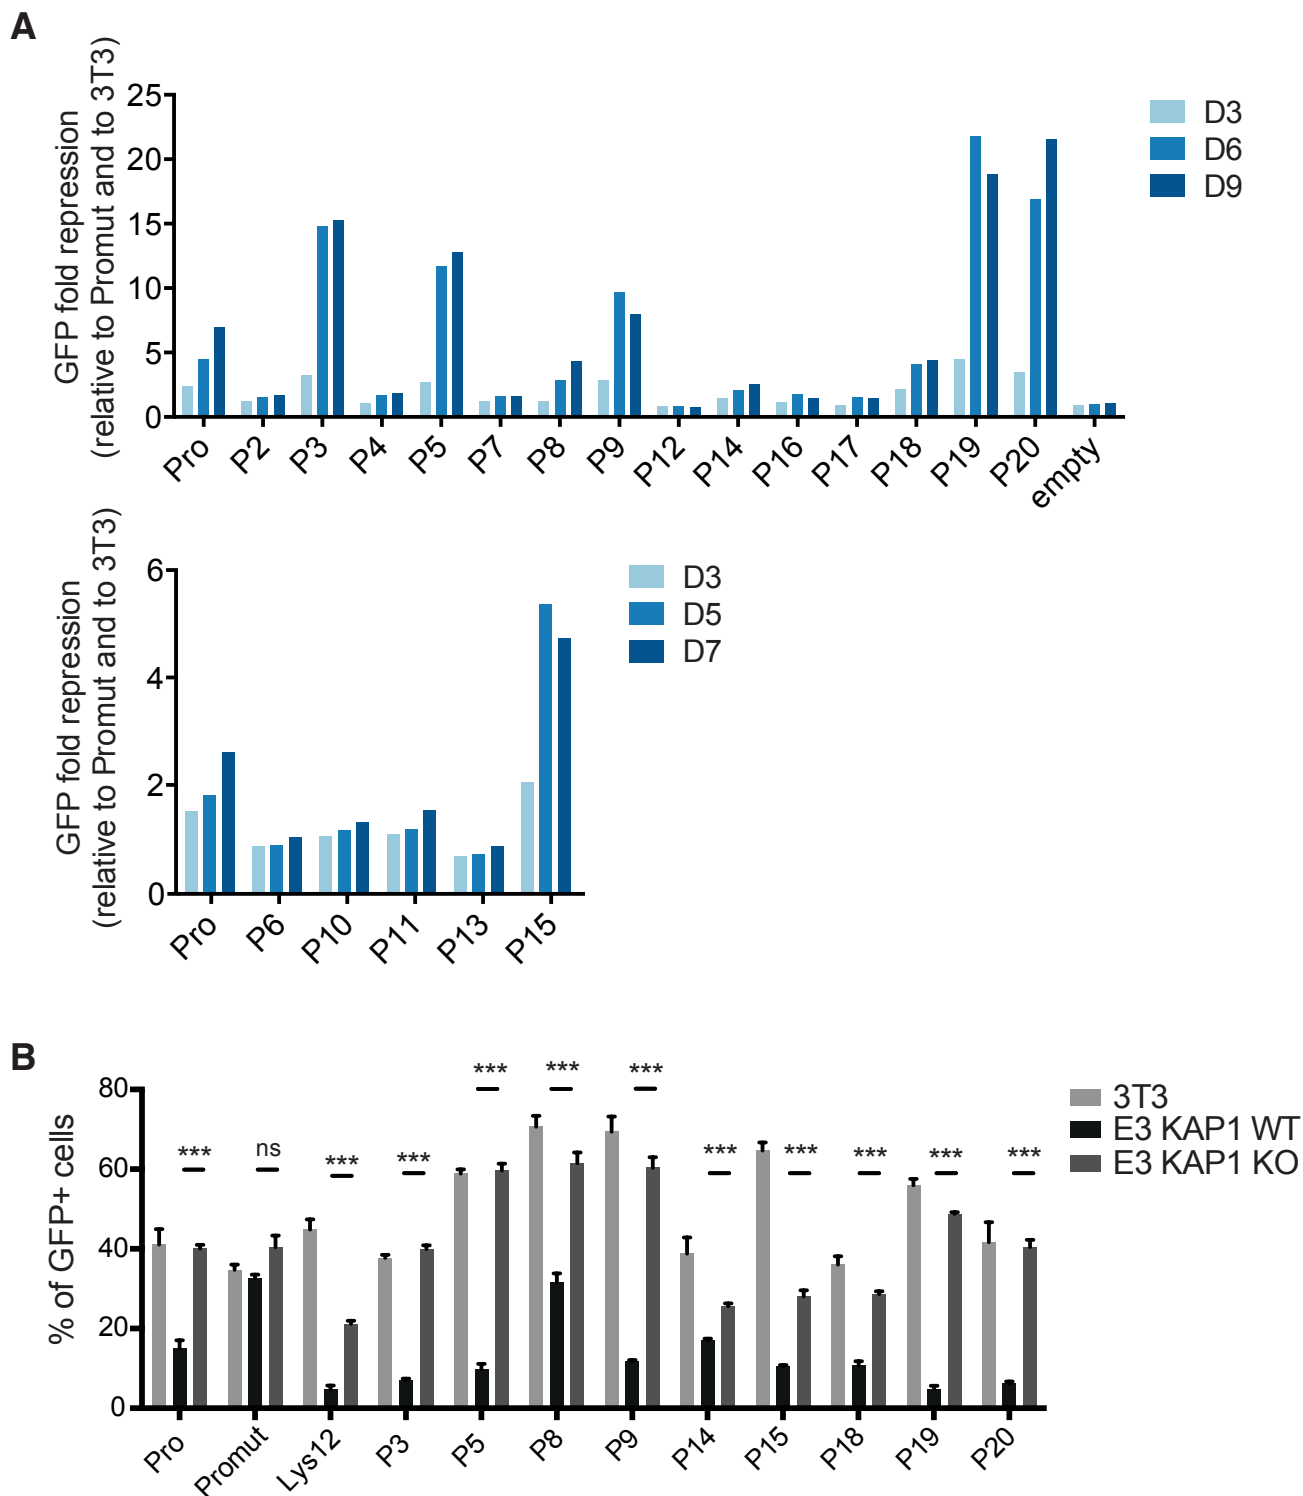

**Figure S1, related to Figure 1. Ten of the DNA target sequences selected for the screen are repressed in murine ES in a KAP1-dependent manner.**

(A) Repression assays in murine ES cells of selected DNA target sequences. ES or 3T3 cells were transduced with vectors containing the sequence of interest upstream a PGK-GFP cassette and percentage of GFP positive cells was measured by FACS at different time-points after transduction. Data are represented as GFP repression normalized to the negative control Promut and the corresponding 3T3 control. (B) GFP repression assay with strongly repressed target sequences in *Kap1* WT or KO mESC, using 3T3 cells as control (day 4 after transduction). Promut is a negative control, corresponding to a point mutant of  $PBS^{Pro}$  (also known as B2), which is not repressed in mESC. Error bars represent SD, \*\*\*  $p \leq 0.001$ , ns= not significant, Student's t test.

**A**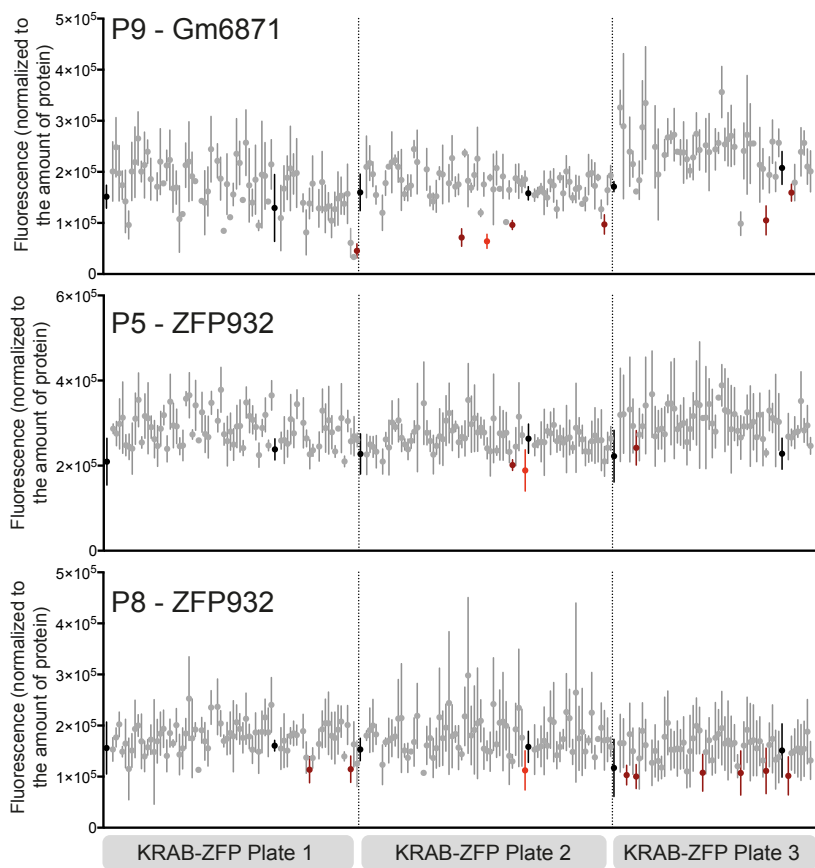**B**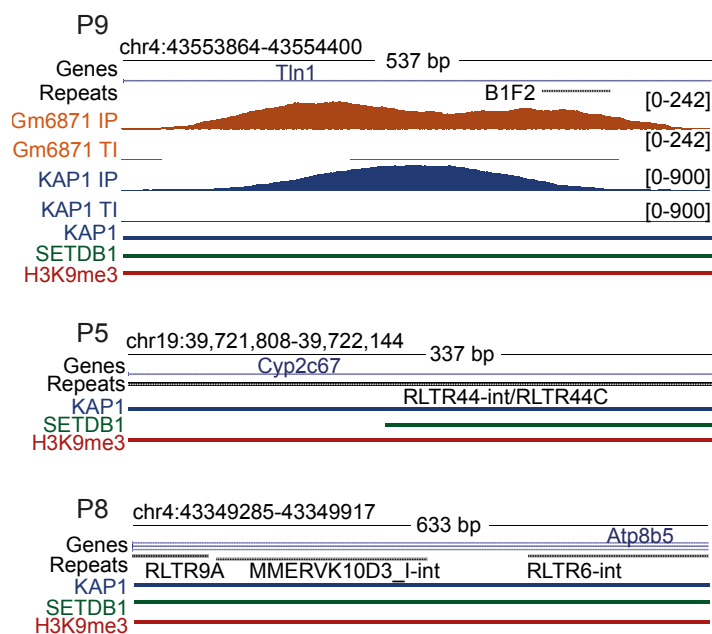**C**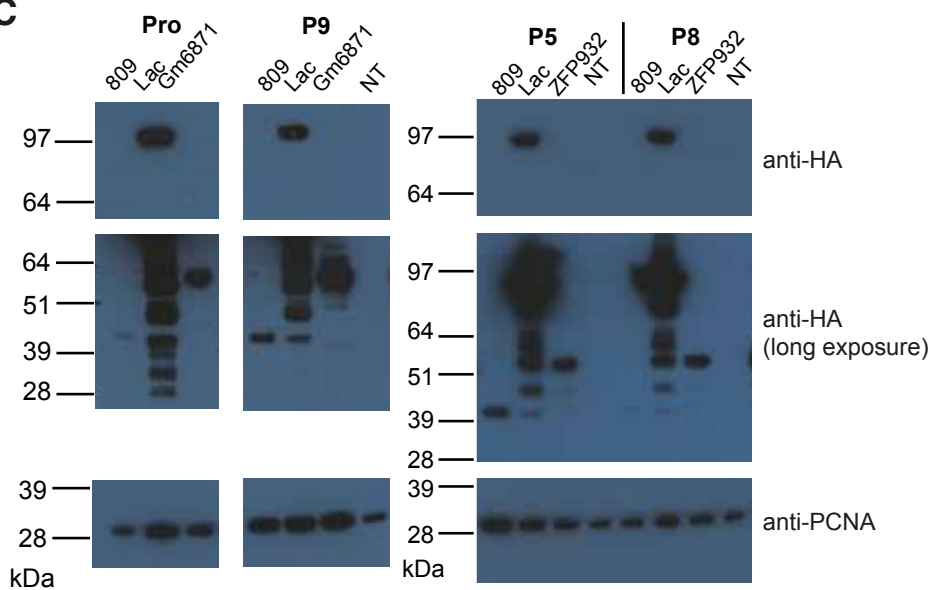**D**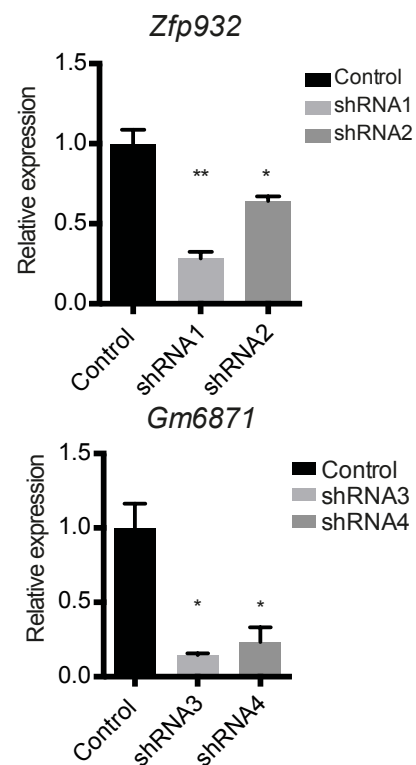**E**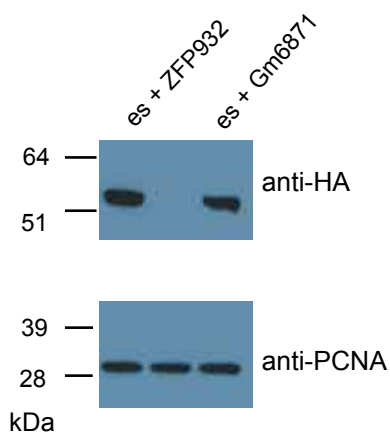

**Figure S2, related to Figure 2. Hits identified by subjecting selected target sequences to functional screen.**

(A) Normalized fluorescence high-throughput readout for P9 and Gm6871, and P5/P8 and ZFP932. Black: transfection control; red: hits identified by plate reader; light red: hits confirmed by FACS. (B) Genomic region of P9, P5 and P8. Different ChIP-seq peaks or reads densities are shown for each locus. (C) Western blot control of 293T cells overexpressing HA-tagged proteins, referent to experiment in Figure 2A. (D) Levels of *Zfp932* and *Gm15446* mRNA upon KRAB-ZFP depletion through shRNAs, corresponding to experiment depicted in Figure 2B. (E) Western blot of ES cell lines overexpressing HA-tagged ZFP932 or Gm6871, used for ChIP-PCR in Figure 2C. Error bars represent SD, \*  $p < 0.05$ , \*\*  $p \leq 0.01$ , Student's t test.

**A**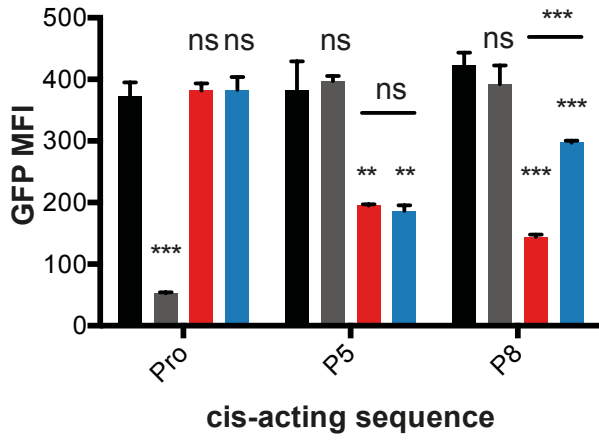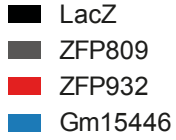**B**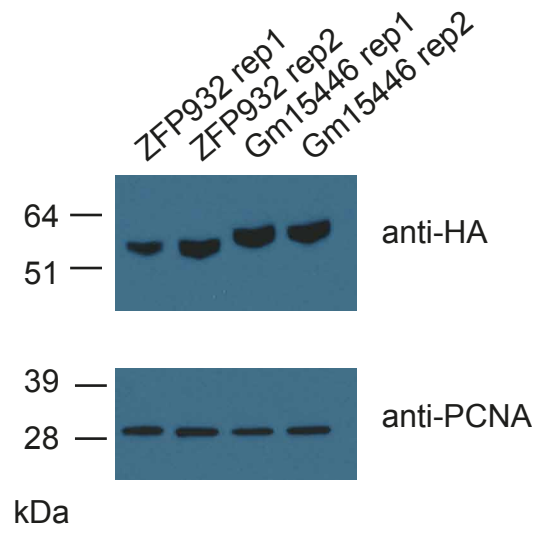**C**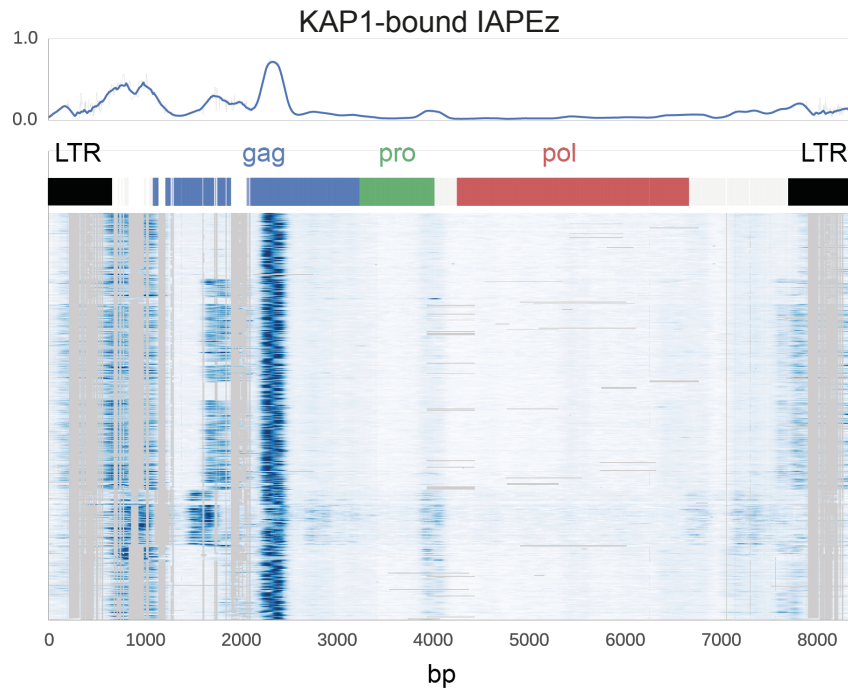**D**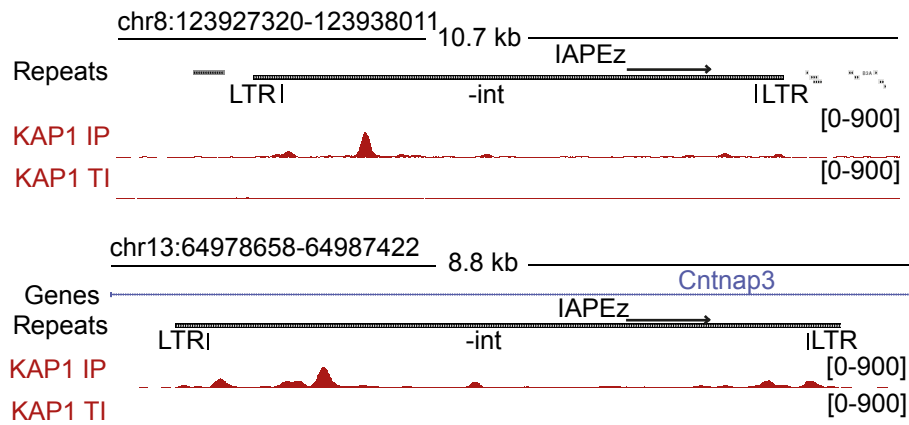

**Figure S3, related to Figure 3. Differential regulation of TEs by the KRAB/KAP1 system.**

(A) GFP repression assay of ZFP932/Gm15446 targets upon KRAB-ZFPs overexpression in 293T cell lines containing target *cis*-acting sequence upstream of PGK-GFP cassette. GFP mean fluorescence intensity is displayed and *P* value presented is relative to LacZ control, unless otherwise specified. (B) Western blot of ES cell lines used for ChIP-seq, overexpressing HA-tagged derivatives of ZFP932 or Gm15446. (C) Coverage plot of KAP1 ChIP-seq in ES cells on multiple alignment of “full length” (>6kb) IAPEz-int bound by KAP1. IAPEz rebase consensus is represented, and mean of binding coverage is depicted on top. Each row is individually normalized, with enrichment proportional to darkness of the blue color. (D) Two representative genomic regions containing full-length IAPEz. LTRs are highlighted and KAP1 ChIP-seq signal in murine ES is depicted. Error bars represent SD, \*\*  $p \leq 0.01$ , \*\*\*  $p \leq 0.001$ , ns= not significant, Student’s t test.

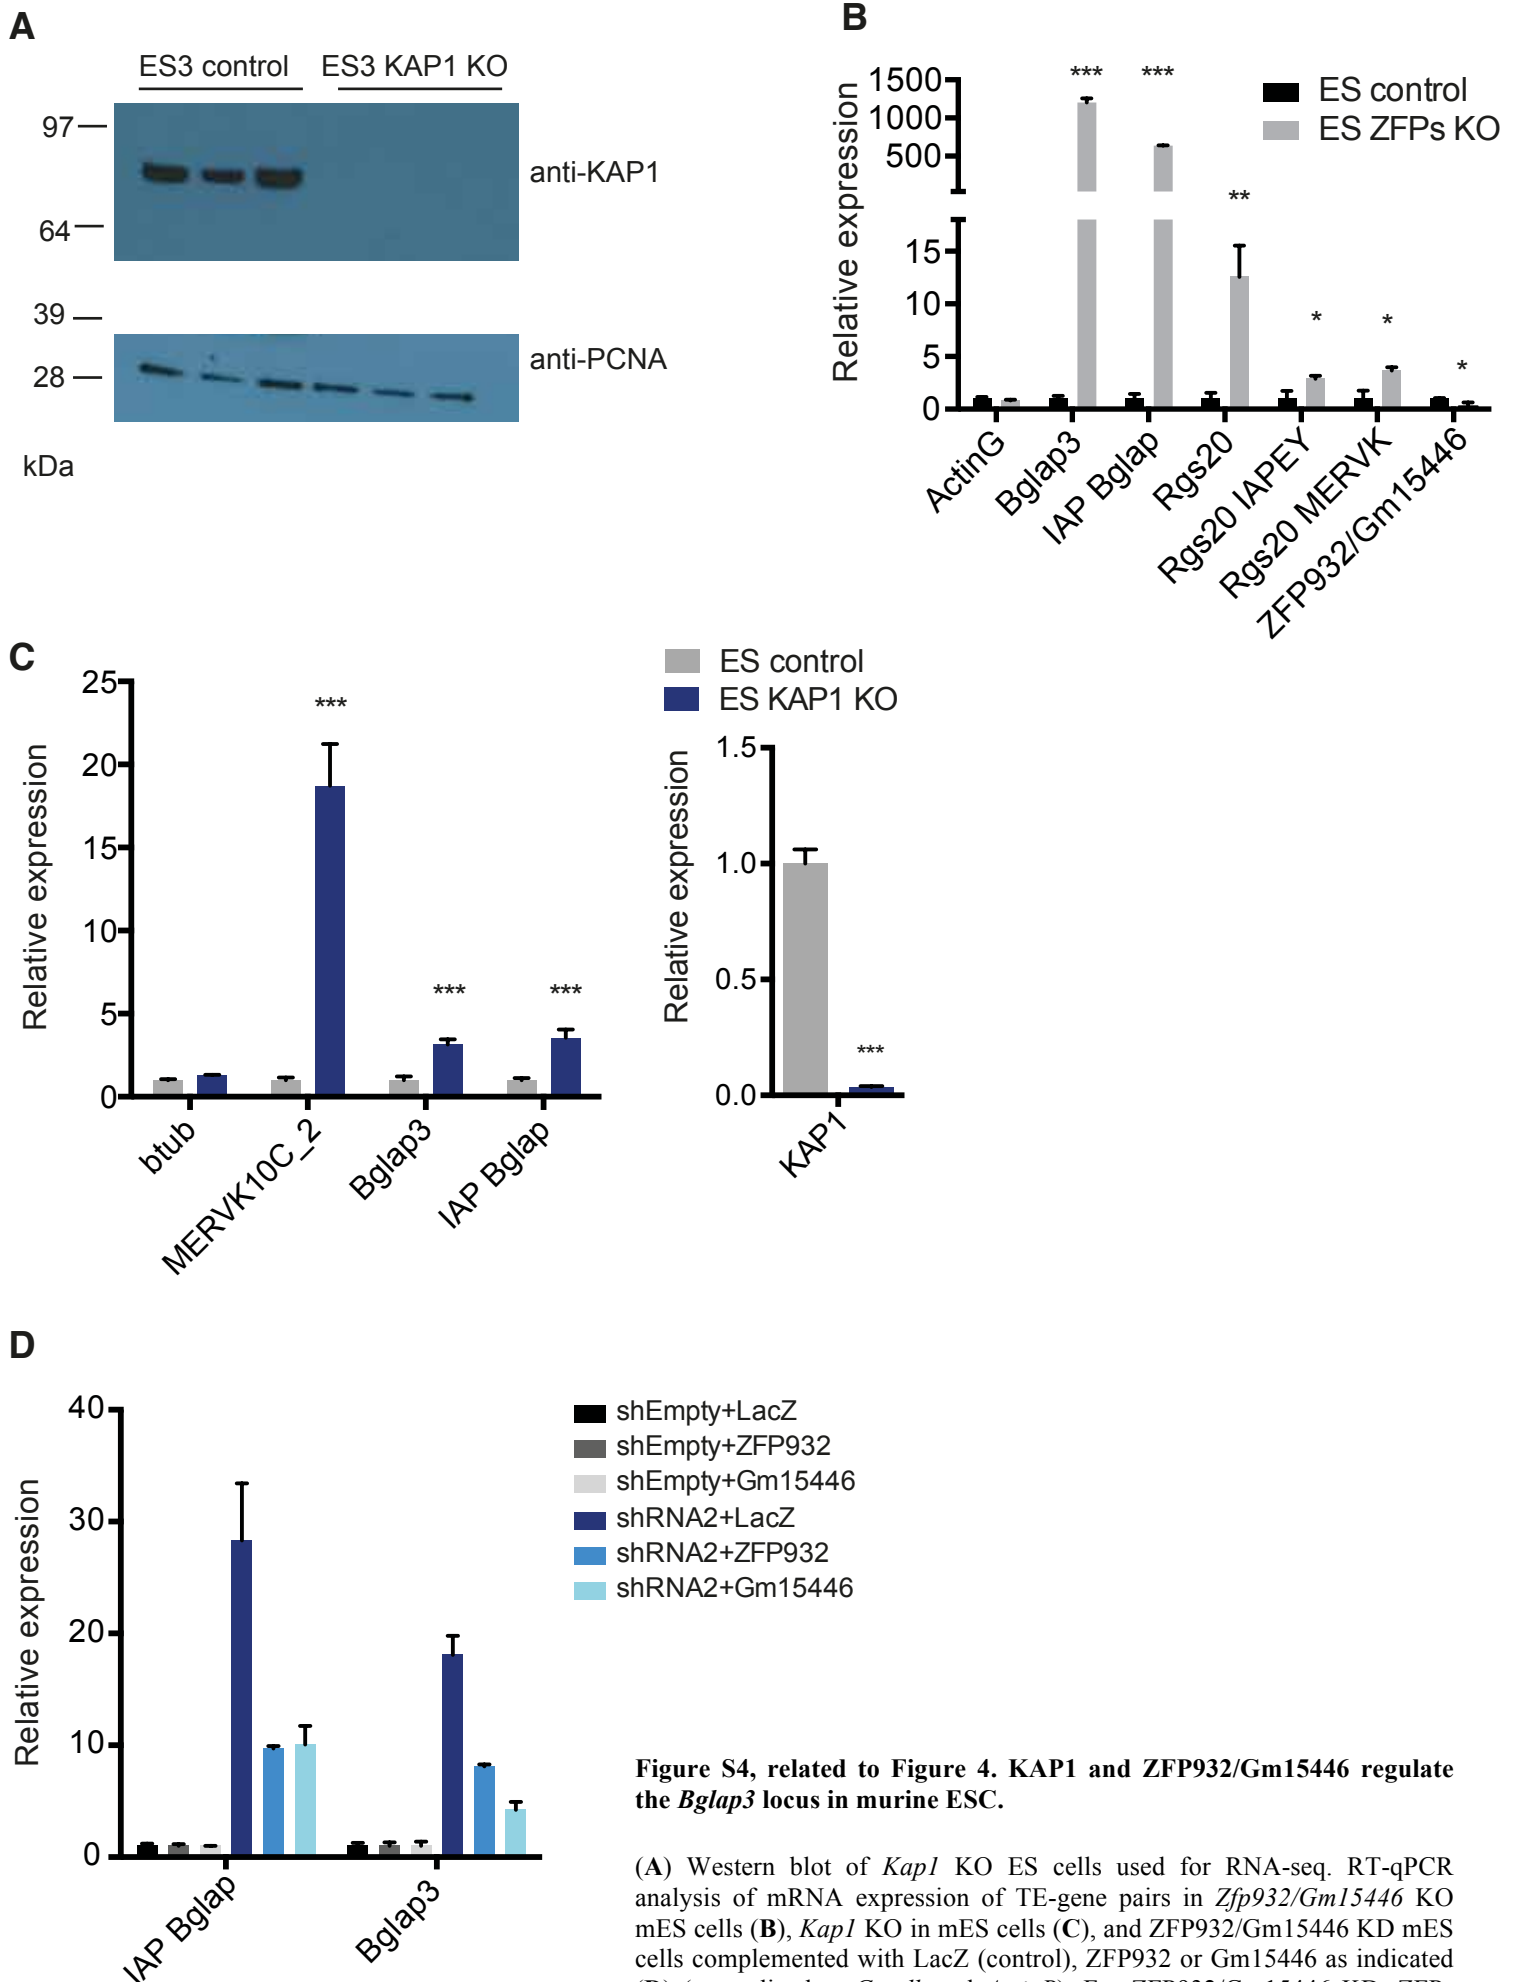

**Figure S4, related to Figure 4. KAP1 and ZFP932/Gm15446 regulate the *Bglap3* locus in murine ESC.**

(A) Western blot of *Kap1* KO ES cells used for RNA-seq. RT-qPCR analysis of mRNA expression of TE-gene pairs in *Zfp932/Gm15446* KO mES cells (B), *Kap1* KO in mES cells (C), and ZFP932/Gm15446 KD mES cells complemented with LacZ (control), ZFP932 or Gm15446 as indicated (D) (normalized to *Gapdh* and *ActinB*). For ZFP932/Gm15446 KD, ZFPs depletion was between 50-60%. Error bars represent SD, \*  $p < 0.05$ , \*\*  $p \leq 0.01$ , \*\*\*  $p \leq 0.001$ , Student's t test.

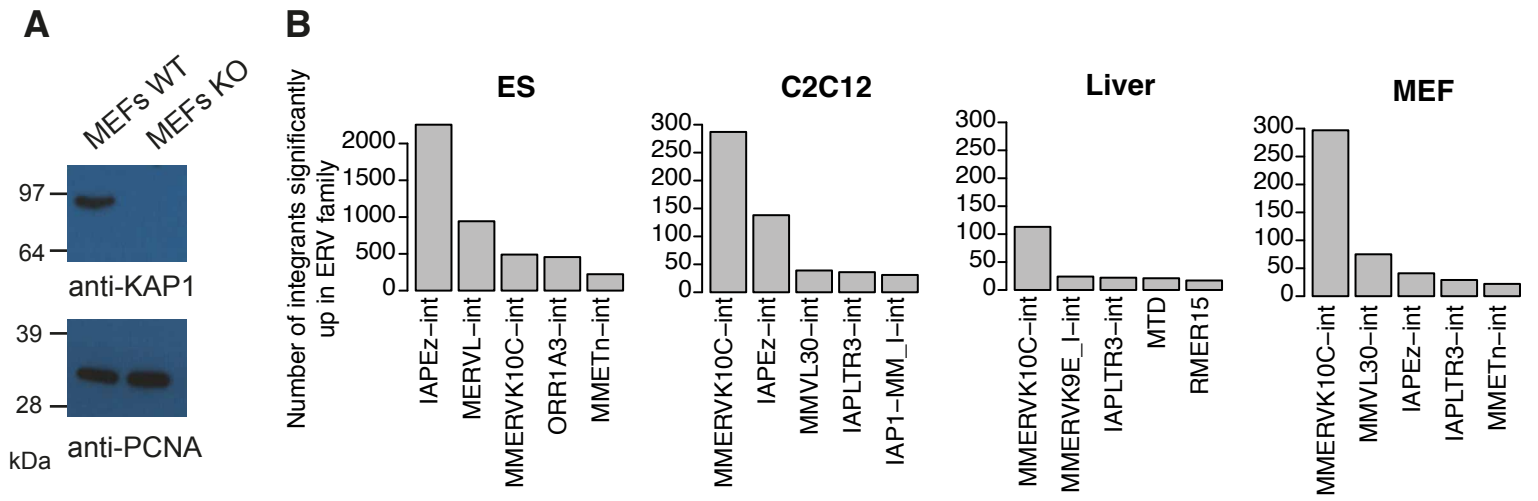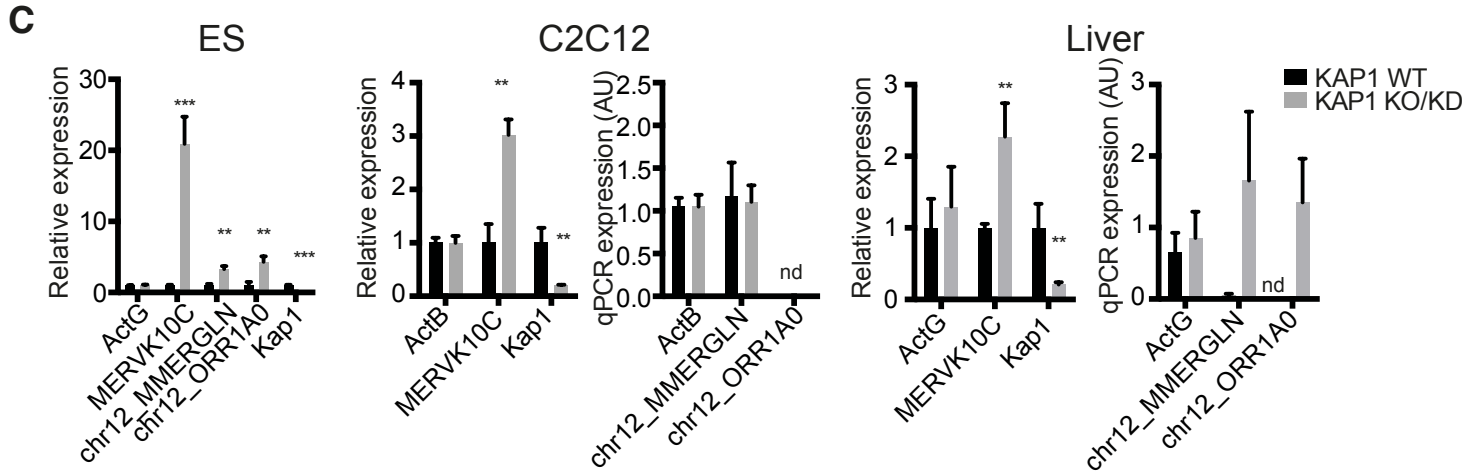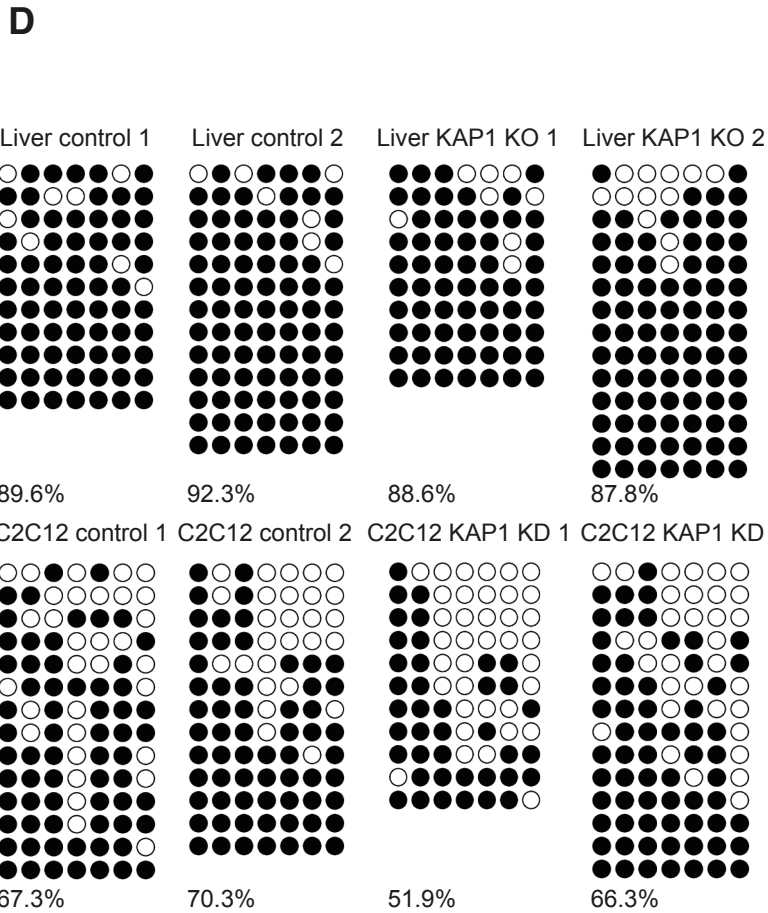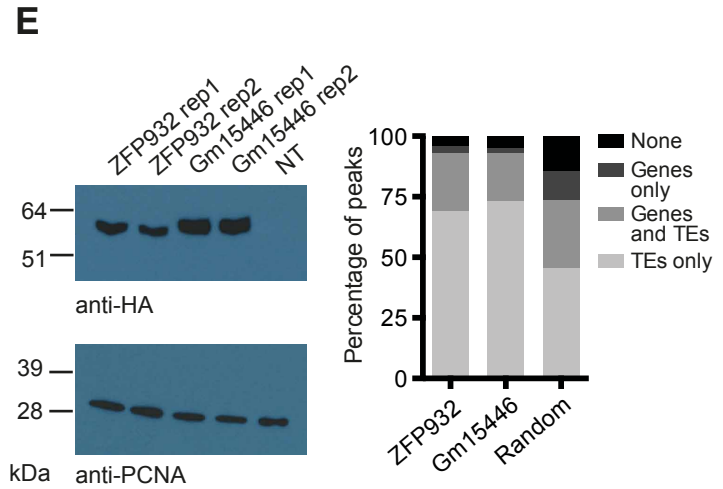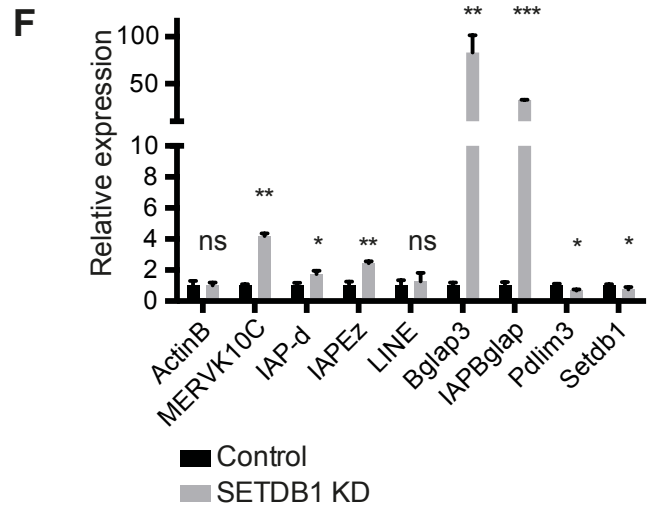



**Figure S5, related to Figure 5. ERVs are controlled by KAP1 in differentiated cells.**

(A) Western blot of MEFs *Kap1* KO cells used for RNA-seq. (B) Top 5 upregulated ERV families upon KAP1 depletion in different cells and tissues. Criteria for inclusion were more than 2-fold upregulation when compared to control cells and adjusted  $P$  value  $\leq 0.05$ . (C) mRNA expression of ERVs in liver, C2C12, and ES KAP1-depleted cells versus control (ES and liver samples are normalized to *Gapdh* and *ActinB*; C2C12 samples are normalized to *ActinG* and *Tbp*). MERVK10C and MERGLN/ORR1A0 expression was measured with general and locus-specific primers, respectively. nd, not detected. (D) Bisulfite sequencing of MMERVK10C-int sequences in *Kap1* KO vs. wild type liver and in KAP1 KD vs. control C2C12 cells. Empty and full circles correspond to unmethylated and methylated CpG dinucleotides, respectively. (E) Western blot of C2C12 cell lines used for ChIP-seq, overexpressing HA-tagged derivatives of ZFP932 or Gm15446; and percentage of ZFP932, Gm15446, or random control peaks on genic and repeated regions. Random control is based on the mean of 100 random shuffling of the peaks of Gm15446 (KRAB-ZFP ChIP with more peaks). (F) RT-qPCR analysis of mRNA expression of general ERVKs, *Bglap3* gene, and IAP *Bglap* in SETDB1 KD C2C12 cells (samples are normalized to *ActinG* and *Tbp*). *Plim3* is a control gene known to be downregulated. Error bars represent SD, \*  $p < 0.05$ , \*\*  $p \leq 0.01$ , \*\*\*  $p \leq 0.001$ , ns= not significant, Student's t test.

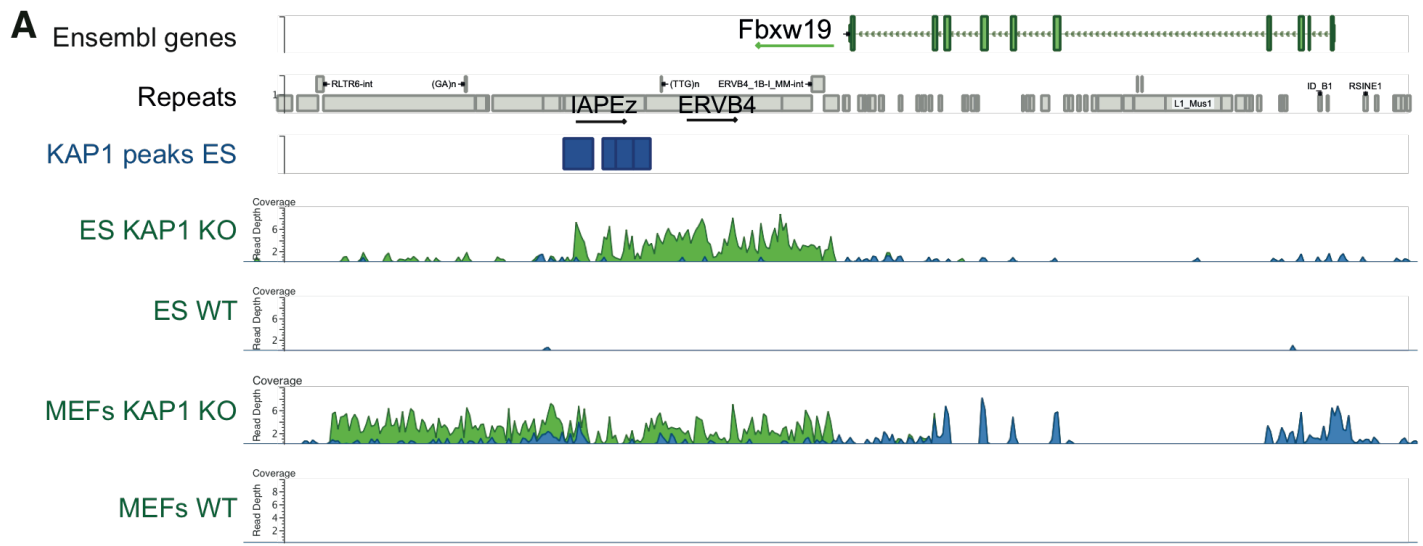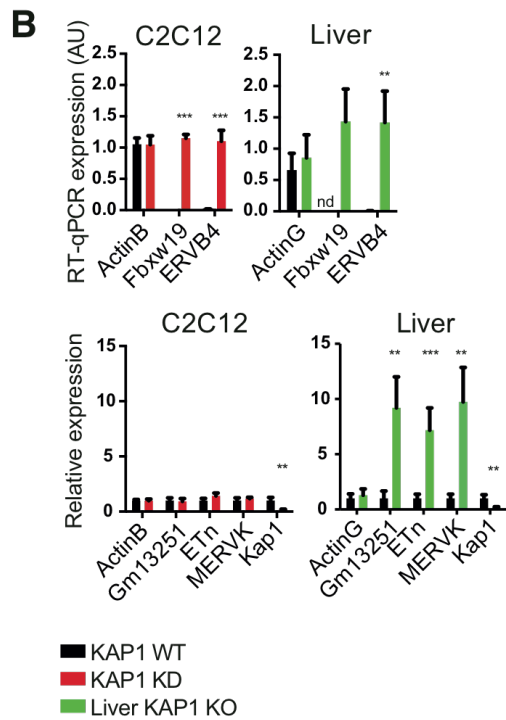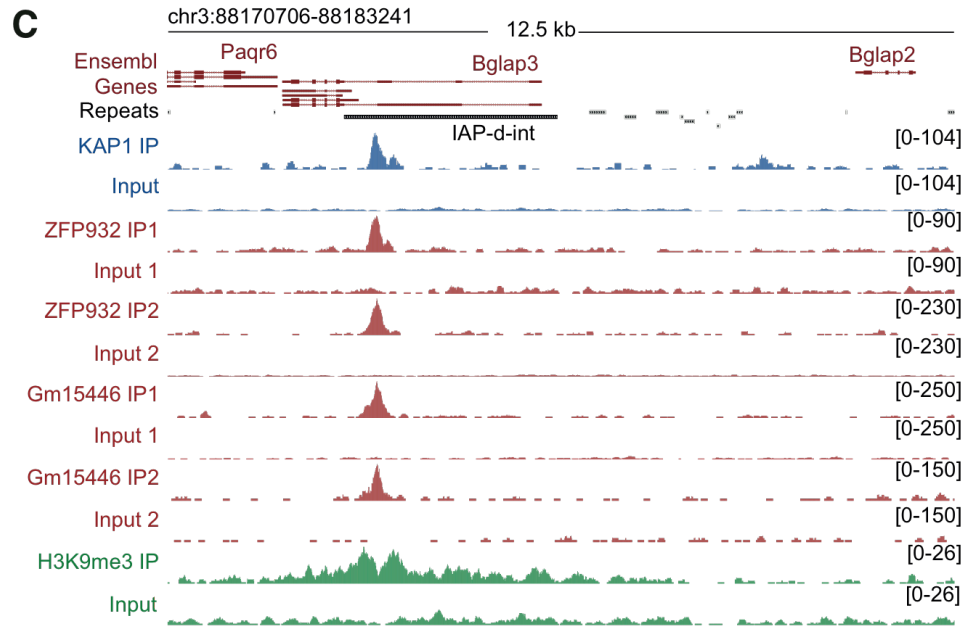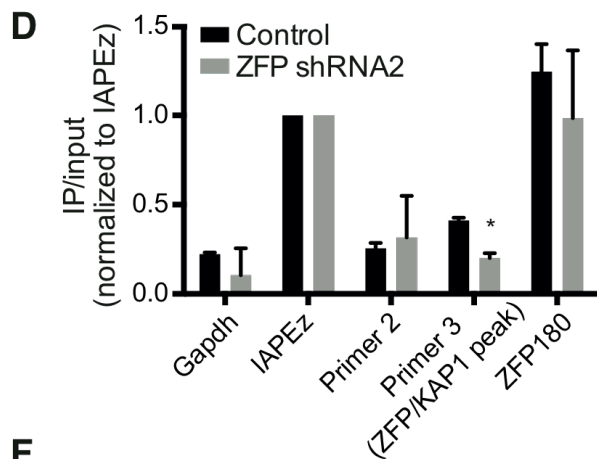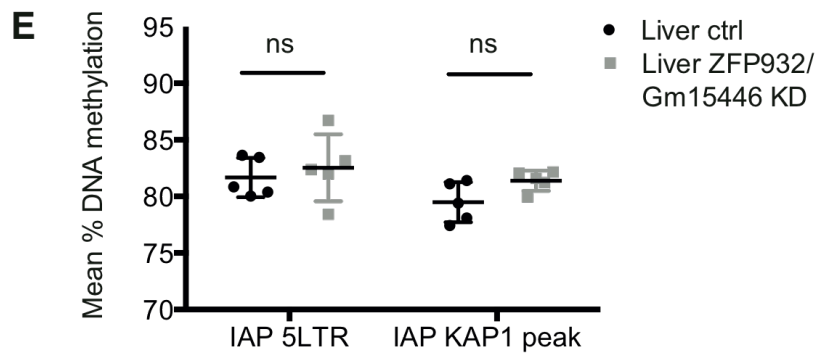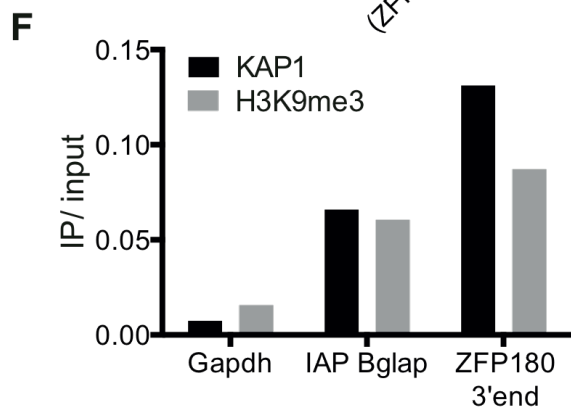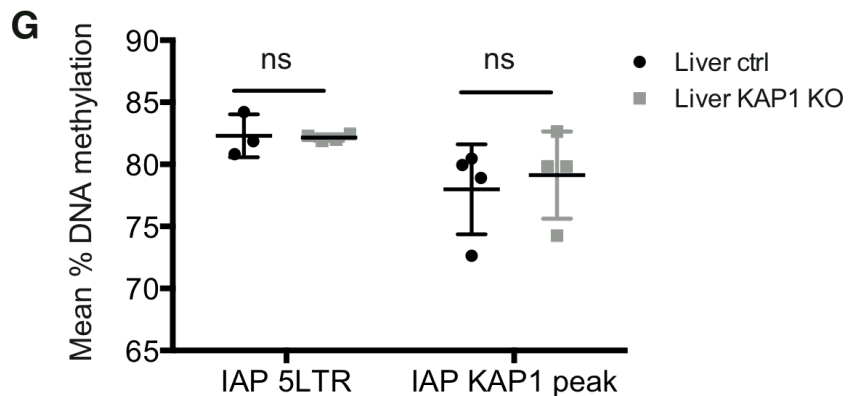

**Figure S6, related to Figure 6. ZFP932/Gm15446 regulate the *Bglap3* locus in differentiated cells.**

(A) GenomeBrowse screenshot of *Fbxw19* locus with coverage of stranded RNA-seq data in mESC and MEFs WT and KO for *Kap1*. Coverage in the sense strand is represented in green and in the anti-sense strand in blue. The orientation of the genes and TEs is represented with arrows. (B) Liver and C2C12 mRNA expression upon KAP1 depletion of two genomic regions with gene and TEs controlled by KAP1 in differentiated cells (liver samples are normalized to *Gapdh* and *ActinB*, and C2C12 samples to *ActinG* and *Tbp*). nd, not detected. AU, arbitrary units. (C) ChIP-seq density of ZFP932/Gm15446 and associated effectors on the *Bglap3* locus in C2C12 are illustrated. (D) ChIP-PCR of KAP1 in ZFP932/Gm15446 KD cells, normalized to IAPEz positive control. KD levels are of 65%. Primer 2 and 3 correspond to numbering present in Fig 4C. (E) Pyrosequencing of IAP *Bglap* in ZFP932/Gm15446 KD mouse liver, compared to control. (F) ChIP-PCR of KAP1 and H3K9me3 in mouse liver. (G) Pyrosequencing of IAP *Bglap* in *Kap1* KO mouse liver, compared to control. For DNA methylation analysis, mean CpG DNA methylation per sequence and per replicate was calculated. Error bars represent SD, \*  $p < 0.05$ , \*\*  $p \leq 0.01$ , \*\*\*  $p \leq 0.001$ , ns= not significant, Student's t test.

**SUPPLEMENTAL TABLES**

**Table S1, related to Figure1.** Sequences selected from ChIP-seq analysis to be tested in the screen.

| Sequence ID | chromosome | start     | end       | size (bp) | TE                                   | gene                                  |
|-------------|------------|-----------|-----------|-----------|--------------------------------------|---------------------------------------|
| P2          | chr15      | 96071841  | 96072638  | 797       | IAPEY_LTR, MIRc                      | ENSMUSG00000085460,ENSMUSG00000086809 |
| P3          | chr16      | 16373546  | 16374572  | 1026      | RLTR44-int                           | -                                     |
| P4          | chr17      | 17449713  | 17450247  | 534       | Lx4A, LTRIS2                         | -                                     |
| P5          | chr19      | 39721807  | 39722144  | 337       | RLTR44-int                           | ENSMUSG00000062624                    |
| P6          | chr2       | 24366644  | 24367245  | 601       | LTRIS2                               | -                                     |
| P7          | chr2       | 28285331  | 28285800  | 469       | LTRIS2                               | -                                     |
| P8          | chr4       | 43349284  | 43349917  | 633       | RLTR9A3, MMERVK10D3_I-int, RLTR6-int | ENSMUSG00000028457                    |
| P9          | chr4       | 43553863  | 43554400  | 537       | B1F2                                 | ENSMUSG00000028465                    |
| P10         | chr4       | 55012441  | 55013092  | 651       | L1MA5                                | ENSMUSG00000060206                    |
| P11         | chr4       | 152526608 | 152527445 | 837       | MTC-int                              | -                                     |
| P12         | chr4       | 155549797 | 155550889 | 1092      | B1_Mur3, MT2B                        | ENSMUSG00000041936                    |
| P13         | chr5       | 114074078 | 114074817 | 739       | L2b, MTEa                            | ENSMUSG00000042190                    |
| P14         | chr5       | 130162484 | 130163546 | 1063      | -                                    | ENSMUSG00000051034                    |
| P15         | chr6       | 4873614   | 4874324   | 710       | RLTRETN_Mm                           | ENSMUSG00000032827                    |
| P16         | chr6       | 48546386  | 48547039  | 653       | -                                    | ENSMUSG00000052751                    |
| P17         | chr7       | 26652988  | 26653803  | 816       | RLTR44-int, ORR1E                    | -                                     |
| P18         | chr7       | 86361075  | 86361707  | 632       | B2_Mm2, LTRIS2                       | -                                     |
| P19         | chr8       | 88210944  | 88211630  | 686       | ORR1A3-int                           | ENSMUSG00000036902                    |
| P20         | chr9       | 87086351  | 87086989  | 638       | RLTR44-int                           | ENSMUSG00000056919                    |

**Table S2, related to Figure1.** Library of KRAB-ZFPs and controls used in the screen, with index number.

## SUPPLEMENTAL EXPERIMENTAL PROCEDURES

**Plasmids and lentiviral vectors.** For the screen, DNA targets were cloned into the pENTR/D/TOPO vector and transferred via gateway cloning into a pRRLSIN.cPPT.PGK-GFP.WPRE vector that was modified to contain R1-R2 gateway sites upstream the PGK-GFP cassette (pRRLSIN.cPPT.R1R2.PGK-GFP.WPRE). The KRAB-ZFP library was obtained partially from previous work (Gubelmann et al., 2013), and the remaining was codon optimized, synthesized into pENTR vectors, and further transferred via gateway cloning into a puromycin-selectable lentivector under a tetracyclin-inducible TRE promoter to obtain HA-tagged proteins (pSIN-TRE-R1R2-3xHA). pLKO.puro shRNA vectors or versions modified to contain the hygromycin resistance or tomato red cDNAs were used for KAP1 and ZFPs KD. The shRNA for *ZFP932/Gm15446* were obtained from the RNAi Consortium (<http://www.broadinstitute.org/rnai/public/>) or designed using the KRIBB siRNA AsiDesigner tool (<http://sysbio.kribb.re.kr:8080/AsiDesigner/menuDesigner.jsf>). For CRISPR-mediated KO, the lentiCRISPR vector (Shalem et al., 2014) was modified with an ubiquitin promoter in place of the EF1short promoter. sgRNA sequences were designed using the Zhang lab tool (<http://crispr.mit.edu/>). For KAP1 overexpression, pSicoR-KAP1-HA vector was used. Lentiviral vectors production protocols are detailed at <http://tronolab.epfl.ch> and backbones are available at Addgene (<http://www.addgene.org>).

**Cell culture and cell-based assays.** Mouse ES cells were cultured as previously described (Rowe et al., 2013a), using the *Kap1 loxP/loxP* ES3 line or its *Kap1* conditional KO derivative after transduction with a tamoxifen-inducible Cre vector (Rowe et al., 2010). For KO induction, cells were treated overnight with 1 $\mu$ M tamoxifen (Sigma) and collected at the latest 4-5 days later. *Kap1* KO and *loxP/loxP* control MEFs were generated and cultured as previously described (Rowe et al., 2013b). For KRAB-ZFP KO experiments, murine ES cells were transduced with an integrase defective lentiviral vector containing the pLentiCRISPR with an sgRNA for *Zfp932* and *Gm15446* or a control sgRNA against luciferase. Cells were selected for puromycin, and cloned from single cells. Two clones were selected and genotyped by PCR followed by TOPO cloning and Sanger sequencing. Clone 1 had a 909bp deletion in *Zfp932* disrupting exon 2 and a 4bp deletion in *Gm15446* (in exon 2); in clone 2 exons 2 and 3 of *Zfp932* and *Gm15446* were damaged. KRAB-ZFPs KD was induced with shRNA vectors for *Zfp932/Gm15446* on untransduced cells or on cells previously transduced with TRE vector containing LacZ control or ZFP for rescue experiments. For repression assays, cells were transduced at low multiplicity of infection (MOI), GFP fluorescence was assessed by flow cytometry, and ES cells pluripotency was monitored by anti-SSEA1 staining (BD Pharmingen, 560142). KAP1 KD was performed with shRNA vectors for *Kap1*. For KRAB-ZFPs ChIP experiments, C2C12 or ES cells were transduced with HA-tagged pSIN-TRE lentiviral vectors containing the codon-optimized KRAB-ZFP of interest, selected, and treated with doxycycline for 48h before harvesting. For KAP1 ChIP experiments in MEFs, MEF *Kap1* KO cells were complemented with HA-tagged KAP1 with levels similar to the endogenous protein. Cells were selected with 1 $\mu$ g/mL puromycin or 100  $\mu$ g/mL hygromycin when necessary.

**Mouse work.** Lentiviral transgenesis was performed by perivitelline injection of pLKO.tomato vectors containing shRNA for *ZFP932/Gm15446* or empty control into fertilized oocytes (strain B6D2F1/J) that were transferred to foster mothers (strain NMRI). Lentiviral vectors for transgenesis were prepared as previously described (Barde et al., 2011), using Episurf medium (Invitrogen), the particle concentration obtained by p24 ELISA (PerkinElmer), and the infectious titer determined on HCT116 cells by tomato flow cytometry. Generated adults were genotyped by flow cytometry of peripheral blood cells and by quantitative PCR to assess the number of lentivector integration in the genome. *Kap1* KO and *ZFP932/Gm15446* KD livers were harvested at 8 weeks of age.

**Functional screen.** DNA target sequences to be tested were chosen from the overlap of publicly available murine ESC ChIP-seq data for KAP1 (GSE41903), SETDB1 (GSE18371), H3K9me3 (GSE41903), and absence of ZFP57 (GSE31183) (Bilodeau et al., 2009; Quenneville et al., 2011; Rowe et al., 2013b). Nineteen sequences corresponding to KAP1 peaks were selected based on presence of TEs or of interesting KAP1 targets (such as 3' end of ZFP genes) (Table S2) and cloned into the pRRLSIN.cPPT.R1R2.PGK-GFP.WPRE vector. These sequences were tested for repression in murine ES and only repressed sequences were tested in the screen. PBS<sup>Lys1,2</sup> sequence was also cloned in the pRRLSIN.cPPT.R1R2.PGK-GFP.WPRE vector and tested in the screen. Lentiviral vectors with these sequences were used to transduce 293T cells at low MOI in order to favour integration of a single copy per cell. GFP positive cells were sorted and used in the screen. The ENSEMBL ID and amino

acid sequences of the KRAB-ZFPs used to establish the screen (Table S1) were obtained from our previously published curation (Corsinotti et al., 2013) and cloned as described above. Reverse transfections and cell culture were done in triplicates in 96-well plates, using a Sciclone ALH 3000 (Caliper Life Sciences) liquid handling robot and a Multidrop Combi dispenser (Thermoscientific). For each well,  $5 \times 10^3$  cells in culture media were added to a  $10 \mu\text{L}$  mix containing 100-150  $\mu\text{g}$  of KRAB-ZFP plasmid and 0.6  $\mu\text{L}$  of Fugene 6 Transfection Reagent (Promega) in Opti-MEM (Life Technologies). All screen plates contained two LacZ plasmids and two empty wells as controls. For induction and selection of the TRE vector, doxycycline (final concentration 5  $\mu\text{g}/\text{mL}$ ) was added 16-20h after transfection, and on the following day cultures were supplemented with puromycin (final concentration 1  $\mu\text{g}/\text{mL}$ ). Cells were harvested on day 6 after transfection, resuspended in RIPA buffer containing protease inhibitors, and GFP was measured using a Tecan Infinite F500 plate reader (Tecan) (excitation at 485 nm and emission at 520 nm). Total protein content was quantified using BCA (BCA Protein Assay Reagent, Thermoscientific), and used to calculate normalized GFP fluorescence. Candidate hits were identified by selecting the 10 KRAB-ZFPs with the lowest normalized fluorescence values per 96-well plate, and only the ones that were present in all 3 replicates were considered. Hits were identified by transfection of the 293T cell line of interest with candidate KRAB-ZFPs in 24-well plates ( $1.5 \times 10^4$  cells/well transfected with 150-200  $\mu\text{g}$  of DNA and 0.38  $\mu\text{L}$  of fugene mix in Opti-MEM); doxycycline and puromycin were added at the same concentrations, with FACS readout after 6 days.

**ChIP-PCR and ChIP-seq.** Cells were harvested, washed with Episerf, fixed in 2mL per  $1 \times 10^7$  cells (10 min in 1% formaldehyde), quenched with glycine in 10mL (at 125 mM final), washed three times with PBS, and pelleted. Each pellet containing  $1 \times 10^7$  cells was lysed, resuspended in 1 mL of sonication buffer on ice (for KRAB-ZFPs: 10 mM Tris at pH 8, 1 mM EDTA, 0.1% SDS, and protease inhibitors; for all others: 10 mM Tris at pH 8, 200 mM NaCl, 1 mM EDTA, 0.5 mM EGTA, 0.1% NaDOC, 0.25% NLS, and protease inhibitors), transferred to TC 12x12 tubes (Covaris), and sonicated (Covaris settings: 20 min, 5% duty cycle, 140W, 200 cycles). Sonication was assessed by reverse cross-linking (65°C, RNAse A at  $1 \mu\text{g}/\mu\text{L}$ , overnight), followed by DNA extraction. Fragment size (between 200-400bp) was checked on a Bioanalyzer (Agilent 2100). Immunoprecipitations were performed with chromatin from  $1 \times 10^7$  cells (for KAP1, histone marks, and PolIII), or  $4 \times 10^7$  (for KRAB-ZFPs), with Dynabeads (ThermoFisher) in IP buffer (for KRAB-ZFPs: 10 mM Tris at pH 8, 1 mM EDTA, 0.1% SDS, 150 mM NaCl, 10% Triton X-100, and protease inhibitors; for all others: 16.25 mM Tris at pH 8.1, 137.5 mM NaCl, 1 mM EDTA, 0.5 mM EGTA, 1.25% Triton X-100, and protease inhibitors) overnight. Chromatin was reversed cross-linked (65°C, Proteinase K at  $400 \text{ng}/\mu\text{L}$ , overnight) and DNA was further extracted for analysis. Antibodies used were HA (Covance, MMS-101P), KAP1 (Tronolab, rabbit polyclonal S23470), H3K9me3 (Diagenode, C15410056), H3K4me1 (Diagenode, pAb-037-050), H3K27ac (Abcam, ab4729), RNA PolIII CTD repeat (Abcam, ab817), H3 (Abcam, ab1791). ChIP samples were used for SYBER Green qPCR (Applied Biosystems) or library preparation for sequencing. Primers (were designed using Primer 3 (Untergasser et al., 2007) or GETPrime (Gubelmann et al., 2011). Libraries of immunoprecipitated chromatin and total input control from ChIP were performed with single-end adaptors as previously described (Rowe et al., 2013b). Sequencing was performed on an Illumina HiSeq 2500 (Illumina), with each library sequenced in 100-bp reads run.

**RT-qPCR and RNA-seq.** Total RNA was extracted and DNase-I treated using a spin column-based RNA purification kit (Macherey-Nagel). Reverse transcription was performed with 500ng of RNA using random primers and SuperScriptII (Invitrogen). Primers were designed using Primer 3 (Untergasser et al., 2007) or GETPrime (Gubelmann et al., 2011), and used for SYBER Green qPCR (Applied Biosystems). For mRNA sequencing, 100-bp single-end RNA-seq libraries were prepared using 200ng of total RNA and the Illumina TruSeq Stranded mRNA reagents (Illumina). Cluster generation was performed with the resulting libraries using the Illumina TruSeq SR Cluster Kit v4 reagents and sequenced on an Illumina HiSeq 2500 (Illumina).

#### Primers, shRNAs and sgRNAs.

##### Primers used in this study

| Primer  | Sequence             | Purpose   |
|---------|----------------------|-----------|
| Gapdh F | GCCCTTCTACAATGCCAAAG | ChIP-qPCR |
| Gapdh R | TTGTGATGGGTGTGAACCAC | ChIP-qPCR |

|                            |                             |                       |
|----------------------------|-----------------------------|-----------------------|
| P9 F                       | CTTGAGGCCAGCCAAGGA          | ChIP-qPCR             |
| P9 R                       | GCCTTAACAGCCTTACTTCTAGAATTG | ChIP-qPCR             |
| P5 F                       | AGCCTTGGAACAGGAACAG         | ChIP-qPCR             |
| P5 R                       | CACACTTTTGCCATCCTGTC        | ChIP-qPCR             |
| P8 F                       | ACACAATCTCCCCCCTTTT         | ChIP-qPCR             |
| P8 F                       | GTGCCCCCTGTCCAGCTA          | ChIP-qPCR             |
| Bglap ChIP 1 F             | CCCAGTGTCTGAAAGGGTAGG       | ChIP-qPCR             |
| Bglap ChIP 1 R             | ATACTGGCCAACAGGAATGC        | ChIP-qPCR             |
| Bglap ChIP 2 F             | TCATGGTGTCTGCTAGGTGTG       | ChIP-qPCR             |
| Bglap ChIP 2 R             | TCAGAATCAGAGGCAACAGG        | ChIP-qPCR             |
| Bglap ChIP 4 F             | TTGGTGCACGTGTTTGACCTG       | ChIP-qPCR             |
| Bglap ChIP 4 R             | AATAAGGTTCCCGGTCTTGG        | ChIP-qPCR             |
| Bglap ChIP 5 F             | CAGCCCAACTGTGTGTTTTC        | ChIP-qPCR             |
| Bglap ChIP 5 R             | ACATTTGGCCACGACCTATG        | ChIP-qPCR             |
| Bglap ChIP 6 F             | TCTCTGATGTAAGCAGGAGGAG      | ChIP-qPCR             |
| Bglap ChIP 6 R             | CAATCACCAACCACAGCATC        | ChIP-qPCR             |
| Bglap ChIP 7 F             | CACACTGTACAAGAGGCTCCAG      | ChIP-qPCR             |
| Bglap ChIP 7 R             | TTGTGCTGGAGTGGTCTCTATG      | ChIP-qPCR             |
| ZFP180 3'end F             | CCGTACAGGTGCAATCTGTG        | ChIP-qPCR             |
| ZFP180 3'end R             | GTTTGTAGCTCTGGCGGAAC        | ChIP-qPCR             |
| Gapdh F                    | TCCATGACAACCTTGGCATTG       | RT-qPCR               |
| Gapdh R                    | AGTCTTCTGGGTGGCAGTGA        | RT-qPCR               |
| Actin F (ActinB)           | CTAAGGCCAACCGTGAAAAGAT      | RT-qPCR               |
| Actin R (ActinB)           | CACAGCCTGGATGGCTACGT        | RT-qPCR               |
| ActinG F                   | TGGATCAGCAAGCAGGAGTATG      | RT-qPCR               |
| ActinG R                   | CCTGCTCAGTCCATCTAGAAGCA     | RT-qPCR               |
| TBP F                      | TTGACCTAAAGACCATTGCACTTC    | RT-qPCR               |
| TBP R                      | TTCTCATGATGACTGCAGCAAA      | RT-qPCR               |
| btub F                     | GCAGTGCGGCAACCAGAT          | RT-qPCR               |
| btub R                     | AGTGGGATCAATGCCATGCT        | RT-qPCR               |
| Bglap3 F                   | CTGACAAAGCCTTCATGTCC        | RT-qPCR               |
| Bglap3 R                   | TCAAGCTCACATAGCTCCC         | RT-qPCR               |
| IAP Bglap F/Bglap ChIP 3 F | AGGTGTTGCAGAGGTTTTGG        | RT-qPCR and ChIP-qPCR |
| IAP Bglap R/Bglap ChIP 3 F | AATATCGGACACAGGGCAAG        | RT-qPCR and ChIP-qPCR |
| Rgs20 F                    | CTACTTGTGGCCTCAATGG         | RT-qPCR               |
| Rgs20 R                    | GACAGTGAGGCAAGAACAG         | RT-qPCR               |
| Rgs20 IAPEY F              | GTTCTGCAAAACAGACTGC         | RT-qPCR               |
| Rgs20 IAPEY R              | ATTGCTCTGGTCAGCCATTC        | RT-qPCR               |
| Rgs20 MERVK F              | ACTGGAGGTCTTGTCTATG         | RT-qPCR               |
| Rgs20 MERVK R              | AGGTTGATGTGCTCTTTCC         | RT-qPCR               |
| ZFP932/Gm15446 F           | TTGCACATCATTGTCATCTCC       | RT-qPCR               |
| ZFP932/Gm15446 R           | CTGACCTACAAAGGCTTTACCAC     | RT-qPCR               |
| MERVK10C F                 | GCCCCTCAATTGGTAGAATG        | RT-qPCR               |

|                 |                              |                        |
|-----------------|------------------------------|------------------------|
| MERVK10C R      | TTCCCGCAGTCTCTAATGC          | RT-qPCR                |
| MERVK10C_2 F    | CAAATAGCCCTACCATATGTCAG      | RT-qPCR                |
| MERVK10C_2 R    | GTATACTTTCTTCTTCAGGTCCAC     | RT-qPCR                |
| KAP1 F          | CGGAAATGTGAGCGTGTCTC         | RT-qPCR                |
| KAP1 R          | CGGTAGCCAGCTGATGCAA          | RT-qPCR                |
| chr12_ORR1A0 F  | GGTTGGAATGGGTGTTTCAC         | RT-qPCR                |
| chr12_ORR1A0 R  | TCGTCCAACCTTCCAAGTCC         | RT-qPCR                |
| chr12_MMERGLN F | ACCCACAGTCTGCAAAATCC         | RT-qPCR                |
| chr12_MMERGLN R | AGTGATGCGGATCCAACTC          | RT-qPCR                |
| Fbxw19 F        | TGTGTACGTGTGGGAGGAGA         | RT-qPCR                |
| Fbxw19 R        | AGAAAGCAGGGAATGGGACT         | RT-qPCR                |
| Fbxw19 ERVB4 F  | TTAAAGCAGGGGAGGTGTTG         | RT-qPCR                |
| Fbxw19 ERVB4 R  | GACCCCTTTTCTTTTCTGG          | RT-qPCR                |
| Gm13251 F       | GATGTGAAGTGTGCTTCGAGT        | RT-qPCR                |
| Gm13251 R       | CACAACAGGACCAGACACCA         | RT-qPCR                |
| Gm13251 Etn F   | TAATCTTTGGGCCAGGACTC         | RT-qPCR                |
| Gm13251 Etn R   | CAAAGAAATGCCACACCTG          | RT-qPCR                |
| Gm13251 MERVK F | AGCCCTTGGGATGATAACAG         | RT-qPCR                |
| Gm13251 MERVK R | GGATAACGCAATGCTGTGTG         | RT-qPCR                |
| Gm6871 F        | ACCTACAGGAATCTCACCAC         | RT-qPCR                |
| Gm6871 R        | GTTTGGTGCCTTCCATGTC          | RT-qPCR                |
| IAP-d F         | CAGCTGAACACAATCACTCATC       | RT-qPCR                |
| IAP-d R         | TCCAGTGCGGGAATCTATG          | RT-qPCR                |
| IAPEz F         | CTTGCCCTTAAAGGTCTAAAAGCA     | RT-qPCR and ChIP-qPCR  |
| IAPEz R         | GCGGTATAAGGTACAATTAAGATATGG  | RT-qPCR and ChIP-qPCR  |
| LINE F          | TTTGGGACACAATGAAAGCA         | RT-qPCR                |
| LINE R          | CTGCCGTCTACTCTTGG            | RT-qPCR                |
| Pdlim3 F        | AACCACAGGAATTCAAACCC         | RT-qPCR                |
| Pdlim3 R        | TGTCATCAATGTTTGCTGCT         | RT-qPCR                |
| Setdb1 F        | GATGTCCCCTTCCCTCTGA          | RT-qPCR                |
| Setdb1 R        | GCATAGCTACGCCACTGA           | RT-qPCR                |
| KVDMR F         | GGGGTTTAAAGGGTTTAAAGATTAT    | pyrosequencing         |
| KVDMR R         | TCATAACCTCCCCCTCCTC          | pyrosequencing         |
| KVDMR Seq       | TGTAAGTTTGGGTATAAAGA         | pyrosequencing         |
| IAP 5LTR F      | GGAATAGTAGTTTATTGGTTAGAATTAT | pyrosequencing         |
| IAP 5LTR R      | CCCCACCACTCTACTTACATCAAT     | pyrosequencing         |
| IAP 5LTR Seq    | GGTTAGAATTATTATTGTTATATG     | pyrosequencing         |
| KAP1 peak F     | GGTTGGTGATAAGTTTAGGGAGTTT    | pyrosequencing         |
| KAP1 peak R     | TACTAACAACCTATCCCCCTCT       | pyrosequencing         |
| KAP1 peak Seq   | GGTGATAAGTTTAGGGAGTTTAA      | pyrosequencing         |
| bisMERVK10C.1F  | ATAGTTTAAATTTAAGATATGGGGTT   | bisulfite              |
| bisMERVK10C.1R  | ACAATAATCAATACCACTCTACAAC    | bisulfite              |
| GAG F           | GGAGCTAGAACGATTCGCAGTTA      | qPCR - mice genotyping |



|                   |                                |                        |
|-------------------|--------------------------------|------------------------|
| GAG R             | GGTGTAGCTGTCCCAGTATTTGTC       | qPCR - mice genotyping |
| GAG T (probe)     | ACAGCCTTCTGATGTTTCTAACAGGCCAGG | qPCR - mice genotyping |
| Albumin F         | GCTGTCATCTCTTGTGGGCTGT         | qPCR - mice genotyping |
| Albumin R         | ACTCATGGGAGCTGCTGGTTC          | qPCR - mice genotyping |
| Albumin T (probe) | CCTGTCATGCCACACAAATCTCTCC      | qPCR - mice genotyping |
| ZFP932 F          | TGACTTTTTTAAAATAAGGGAACAACACTG | CRISPR genotyping      |
| ZFP932 R          | TGGCTCACATTTGTAGCATCA          | CRISPR genotyping      |
| Gm15446 F         | TTTCTCTCTCCCTTTCTCTCTCC        | CRISPR genotyping      |
| Gm15446 R         | CATGGCTCACATTTGTACATCA         | CRISPR genotyping      |
| ZFP932/Gm15446 F  | TGCAACATATATCCTATACAAAGAGCA    | CRISPR genotyping      |
| ZFP932/Gm15446 R  | CATGCCTGCAAAGATAAATTGG         | CRISPR genotyping      |

#### shRNAs and sgRNAs used in this study

| shRNA or sgRNA | sequence (hairpin or sgRNA with PAM)                             | Target               |
|----------------|------------------------------------------------------------------|----------------------|
| shRNA1         | CCGGCCTCTCATGGTCAACTTCAAACCTCGA<br>GTTTGAAGTTGACCATGAGAGGTTTTTG  | ZFP932/Gm15446       |
| shRNA2         | CCGGGCCTATTACGACACAGCATTCTCGA<br>GAATGCTGTGTCGTGAATAGGCTTTTTTG   | ZFP932/Gm15446       |
| shRNA3         | CCGGTATGATAACGTCTTCACATATCTCGA<br>GATATGTGAAGACGTTATCATATTTTTTG  | Gm6871               |
| shRNA4         | CCGGAACGTCTTCACATATCACAGTCTCGA<br>GACTGTGATATGTGAAGACGTTTTTTTTG  | Gm6871               |
| shKAP1         | CCGGCCGCATGTTCAAACAGTTCAAACCTCGA<br>GTTGAACTGTTTGAACATGCGGTTTTTG | KAP1                 |
| shSETDB1       | CCGGGCCTTGATCTTCCATGTCATTCTCGAG<br>AATGACATGGAAGATCAAGGCTTTTTTG  | SETDB1               |
| sg932Gm        | TGTGAAAGCTCCAGAAGACATGG                                          | ZFP932/Gm15446       |
| sgLuc          | ACGCTGGGCGTTAATCAAAGAGG                                          | luciferase (control) |

#### Bioinformatics analyses

**Merged repeats track.** All TE analyses were performed using a merged repeats track generated in-house. As the RepeatMasker annotation often contain TEs fragmented into smaller regions that not always correspond to their biological organization, we generated a new annotation that merges some of this fragments based on ERVs structure. The RepeatMasker 3.2.8 (Repeat Library 20090604, <http://www.repeatmasker.org/species/mm.html>) was used as basis, and we computed a frequency table of LTRs surrounding internal ERV (“ERV-int”) parts for each ERV family. To infer the significance of the LTR-int associations we computed the frequencies distributions of the putative LTR for each “-int”, and performed a Wald test to assign a *P* value to each LTR-int pair. The LTR was attributed to an “-int” family when the *P* value was smaller than 0.001, the frequency of occurrence next to an “-int” was higher than 2%, and it was annotated as an “LTR”. ERV-int integrants that shared the same name, or attributed LTRs, were merged with their neighbouring elements when the distance was shorter than 400 bp and there were no SINEs or LINEs in between. We also kept the fragmented information in our new annotated list. For the final track, the other families of repeats were not modified and were added to the merged ERV/LTR elements.

**ChIP-seq analyses.** Reads were mapped to the mouse genome assembly mm9 using Bowtie 2 short read aligner (Langmead and Salzberg, 2012), using the --sensitive-local mode. The peaks were called using either the MACS program v1.4.2.1 (Zhang et al., 2008) or the SICER software v1.1 for histone modification marks (Zang et al., 2009), with the total input chromatin coverage as control. For MACS we used the default software parameters and selected MACS score above 100. For SICER we used the recommended parameters for histone marks (redundancy threshold: 1, window size: 200, fragment size: 150, effective genome fraction: 0.74, gap size: 400, FDR: 0.01). For KAP1 in ES cells, PeakSplitter was also used (Salmon-Divon et al., 2010) with the default software parameters. For KRAB-ZFPs, all ChIP-seq experiments were performed in duplicates and only the overlap of peaks of both duplicates was considered for the analyses. For KAP1 ChIP-seq in MEFs, experiments were

performed in duplicates and the union of both replicates was used for further analyses. Bigwig tracks were normalized to reads per 100 million mapped reads. Repeats enrichment of Fig 3C and Fig S5 were calculated from the overlap of repeats with ZFP932 or Gm15446 peaks containing KAP1 using the intersect tool (with default parameters) from the BEDtools 2.25.0 software (Quinlan and Hall, 2010) (minimum of 1 bp overlap). As control, we randomly assigned the peaks in the genome and used them in overlaps with repeats (this process was repeated 100 times). Motif search was performed using all ZFP932 and Gm15446 peaks with RSAT (Medina-Rivera et al., 2015), using unbound ERVK sequences as background control.

**Coverage plots.** ChIP-seq signal on each feature of interest were extracted from the bigwig file, and each sequence signal was scaled between 0 and 1. Features were aligned on their 3' end, and plotted on a heatmap using the matplotlib library of Python. For coverage plots with alignments, sequences were multiply aligned using the MAFFT software v. 7.245 (auto parameters and gap extension penalty of 0.123), and the coverage of each sequence was plotted on top of the alignment normalizing it as before. When gaps were created by only one sequence, it was removed from the alignment prior to plotting. Each consensus was then added to the corresponding alignment.

**ERV annotation.** For MMERVK10C-int, consensus sequence and coordinates were taken from Repbase (<http://www.girinst.org/rebase/>). For IAPEz, consensus sequence was taken from Repbase. Coordinates for IAPEz were estimated from an alignment with IAP1-MM\_I (using IAP1-MM\_I Repbase coordinates) and were checked using previous publications (Carmi et al., 2011). IAP Bglap LTR annotation was done by comparison with previously annotated IAP LTRs (Christy et al., 1985).

**RNA-seq analysis.** The RNA-seq reads were mapped to the mm9 genome using TopHat (Kim et al., 2013) with the following parameters: --b2-sensitive --no-novel-juncs --no-novel-indels. These settings allow multimapped reads to be randomly assigned once among the mapped loci. Gene counts were generated using the HTseq-count program with default parameters. TE counts were computed using the multicov script from the BEDtools software with the -split option. Only genes or TEs that had at least as many reads as samples present in the analysis were considered further. Sequencing depth normalization and differential expression analyses were performed using the voom function from the R package LIMMA (Law et al., 2014) from Bioconductor (Gentleman et al., 2004). The gene library sizes as given by voom were used to normalize the TEs counts. To be considered significantly upregulated, a gene or a TE had to have 2-fold increased expression ( $P$  value adjusted  $\leq 0.05$  for *Kap1* KO/KD;  $P$  value  $\leq 0.01$  for *Zfps* KO).  $P$  values were computed using a moderated t-test and corrected for multiple testing using the Benjamini-Hochberg method (Benjamini and Hochberg, 1995). MA plots were generated from normalized count values as given by VOOM and plotted using the matplotlib library of Python.

**Public sequencing data.** Raw reads were downloaded from publicly available ChIP-seq (GEO IDs: GSE41903, GSE18371, GSE31183, GSE48519, GSE62664, GSE58323) and RNA-seq data (GEO IDs: GSE62664). Mapping and data processing was done as described above. CAGE peaks based expression table for mouse of FANTOM 5 data was downloaded from the FANTOM consortium website (<http://fantom.gsc.riken.jp>), and their TSS peaks or max count were obtained from UCSC genome browser public tracks (Lizio et al., 2015). Representative samples were selected and expression in TPM (tags per million) was plotted using R software (<http://www.R-project.org>).

**Heatmaps and boxplots.** Heatmaps were generated with R, using the heatmap.2 function. Both rows and columns were clustered using hierarchical clustering. The agglomeration method was “complete”, and the distance metric used was Pearson distance. For heatmaps of ERV expression, only integrants that had 10 or more reads on average per set of replicates were included. Boxplots were generated using R, and binding to transcription factors was determined using BEDtools with a minimum of 1 bp overlap.

## SUPPLEMENTAL REFERENCES

- Benjamini, Y., and Hochberg, Y. (1995). Controlling the False Discovery Rate: A Practical and Powerful Approach to Multiple Testing. *Journal of the Royal Statistical Society. Series B (Methodological)* 57, 289-300.
- Carmi, S., Church, G.M., and Levanon, E.Y. (2011). Large-scale DNA editing of retrotransposons accelerates mammalian genome evolution. *Nature communications* 2, 519.
- Christy, R.J., Brown, A.R., Gourlie, B.B., and Huang, R.C. (1985). Nucleotide sequences of murine intracisternal A-particle gene LTRs have extensive variability within the R region. *Nucleic acids research* 13, 289-302.
- Gentleman, R.C., Carey, V.J., Bates, D.M., Bolstad, B., Dettling, M., Dudoit, S., Ellis, B., Gautier, L., Ge, Y., Gentry, J., *et al.* (2004). Bioconductor: open software development for computational biology and bioinformatics. *Genome biology* 5, R80.
- Gubelmann, C., Gattiker, A., Massouras, A., Hens, K., David, F., Decouttere, F., Rougemont, J., and Deplancke, B. (2011). GETPrime: a gene- or transcript-specific primer database for quantitative real-time PCR. *Database : the journal of biological databases and curation* 2011, bar040.
- Gubelmann, C., Waszak, S.M., Isakova, A., Holcombe, W., Hens, K., Iagovitina, A., Feuz, J.D., Raghav, S.K., Simicevic, J., and Deplancke, B. (2013). A yeast one-hybrid and microfluidics-based pipeline to map mammalian gene regulatory networks. *Molecular systems biology* 9, 682.
- Quenneville, S., Verde, G., Corsinotti, A., Kapopoulou, A., Jakobsson, J., Offner, S., Baglivo, I., Pedone, P.V., Grimaldi, G., Riccio, A., *et al.* (2011). In embryonic stem cells, ZFP57/KAP1 recognize a methylated hexanucleotide to affect chromatin and DNA methylation of imprinting control regions. *Molecular cell* 44, 361-372.
- Salmon-Divon, M., Dvinge, H., Tammoja, K., and Bertone, P. (2010). PeakAnalyzer: genome-wide annotation of chromatin binding and modification loci. *BMC bioinformatics* 11, 415.
- Shalem, O., Sanjana, N.E., Hartenian, E., Shi, X., Scott, D.A., Mikkelsen, T.S., Heckl, D., Ebert, B.L., Root, D.E., Doench, J.G., *et al.* (2014). Genome-scale CRISPR-Cas9 knockout screening in human cells. *Science (New York, N.Y.)* 343, 84-87.
- Untergasser, A., Nijveen, H., Rao, X., Bisseling, T., Geurts, R., and Leunissen, J.A. (2007). Primer3Plus, an enhanced web interface to Primer3. *Nucleic acids research* 35, W71-74.
